# Supplementary material for: Rhizosphere microbiome promotes wheat salt tolerance through root lignin biosynthesis
Source: Research Square preprint supplement (doi:10.21203/rs.3.rs-8835674/v1), 2026-02-12
Supplement: Supplementary file 1 [file bd4e95e20cca7c5f1f1232fa.docx]

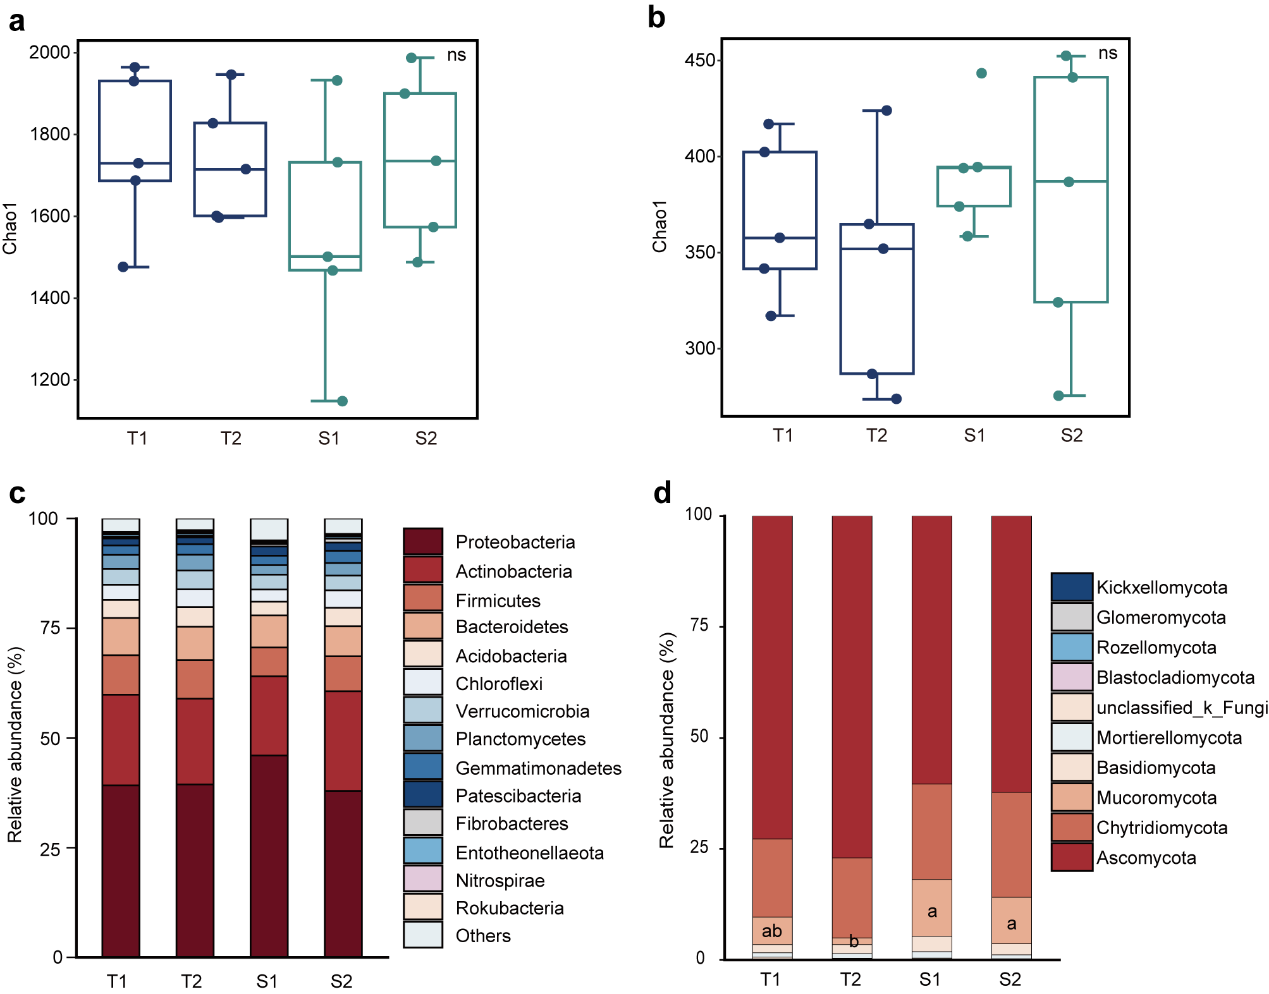


**Supplementary Fig. 1. Microbial diversity and abundance in the conditioning phase.** Chao1 index of rhizosphere **(a)** bacterial and **(b)** fungal communities in T1, T2, S1, and S2. Boxplots indicate median, 25th (box bottom line), 75th (box top line) percentiles, and 5th (the lower whisker) and 95th (the upper whisker) percentiles. (n = 5). ns, not significant. Relative abundance of **(c)** bacterial and **(d)** fungal phyla enriched in the rhizosphere of T1, T2, S1, and S2. Different letters indicate significant differences (*p* < 0.05, Kruskal–Wallis test).

**
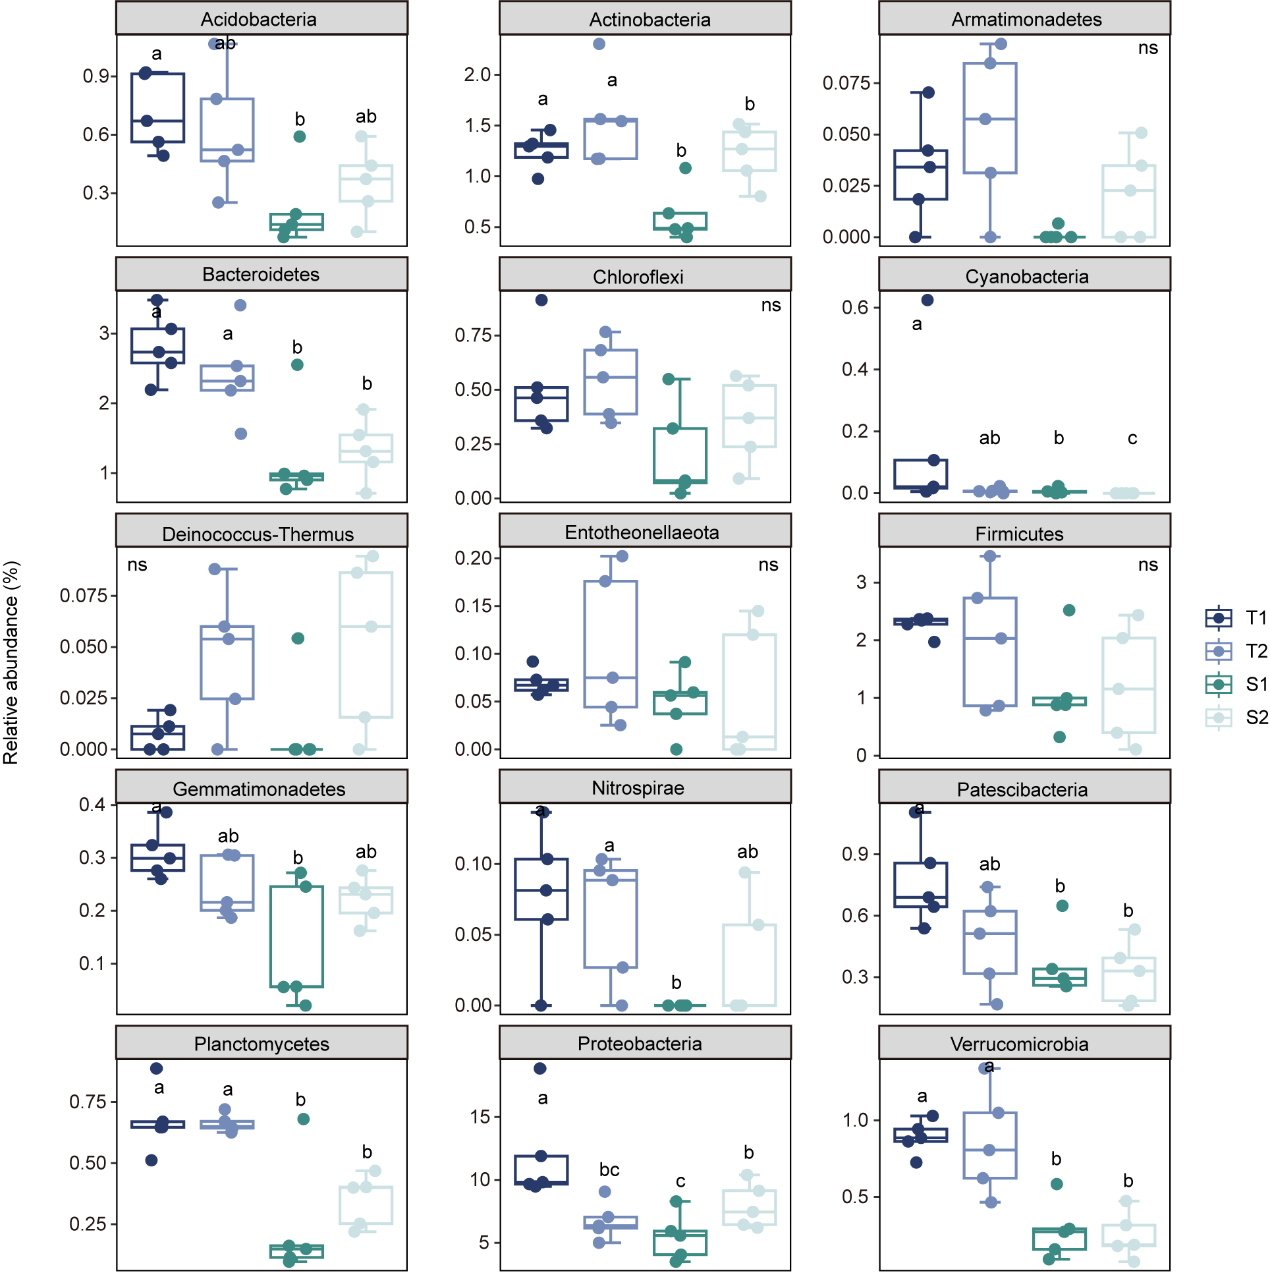
**

**Supplementary Fig. 2. Relative abundance of bacterial phyla enriched in the rhizosphere of T1, T2, S1, and S2 conditoned soils.** Boxplots indicate median, 25th (box bottom line), 75th (box top line) percentiles, and 5th (the lower whisker) and 95th (the upper whisker) percentiles (n = 5). Different letters indicate significant differences (*p* < 0.05, Kruskal–Wallis test); ns, not significant.


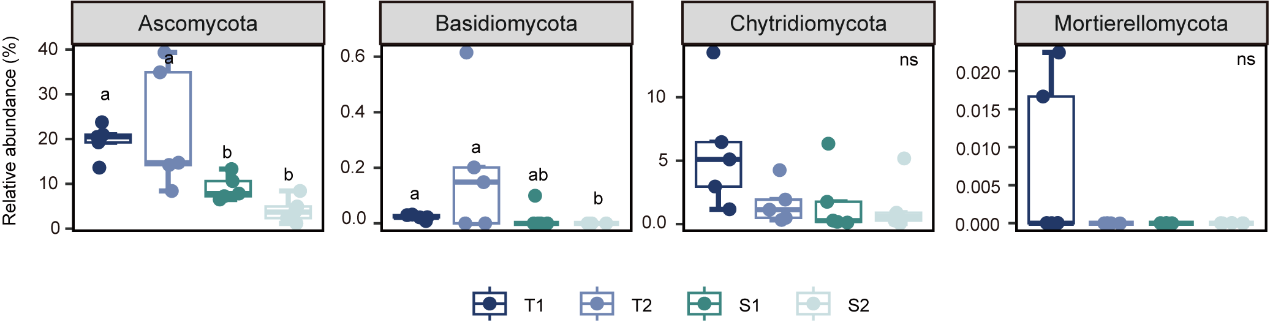


**Supplementary Fig. 3. Relative abundance of fungal phyla enriched in the rhizosphere of T1, T2, S1, and S2 conditoned soils.** Boxplots indicate median, 25th (box bottom line), 75th (box top line) percentiles, and 5th (the lower whisker) and 95th (the upper whisker) percentiles (n = 5). Different letters represent the significant difference (*p* <0.05, Kruskal-Wallis sum-rank test); ns represents no significance.


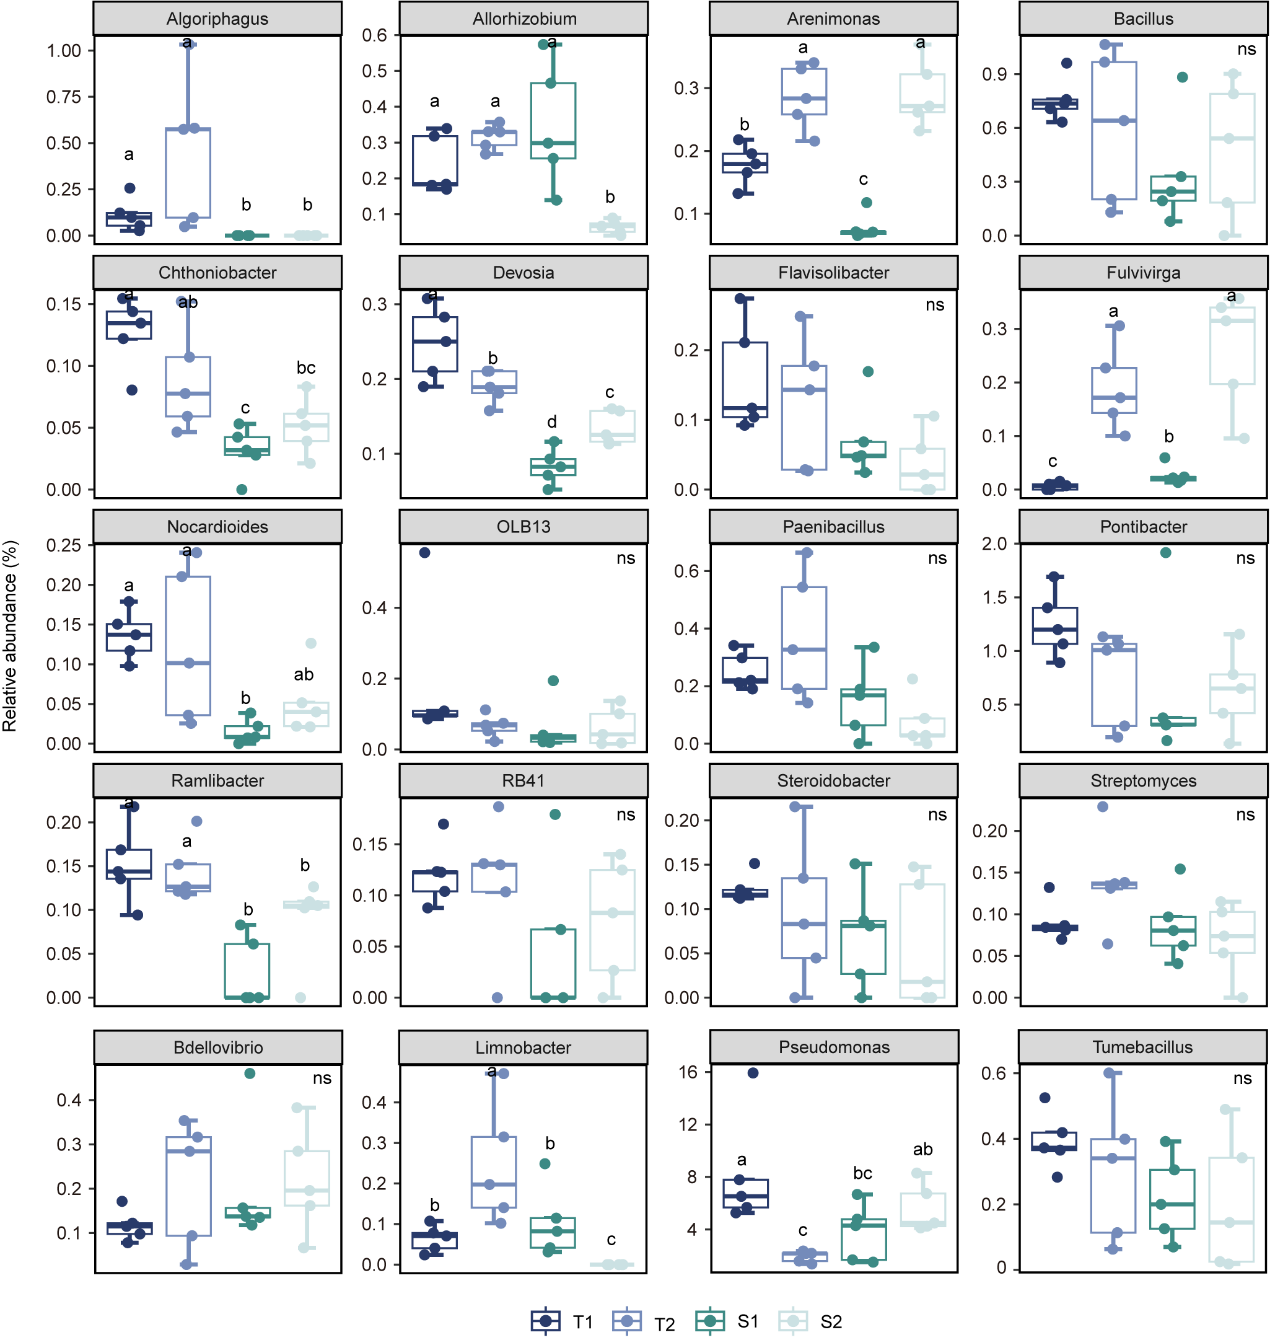


**Supplementary Fig. 4. Relative abundance of bacterial genera enriched in the rhizosphere of T1, T2, S1, and S2 conditioned soils.** Boxplots indicate median, 25th (box bottom line), 75th (box top line) percentiles, and 5th (the lower whisker) and 95th (the upper whisker) percentiles (n = 5). Different letters represent the significant difference (*p* <0.05, Kruskal-Wallis sum-rank test); ns represents no significance.


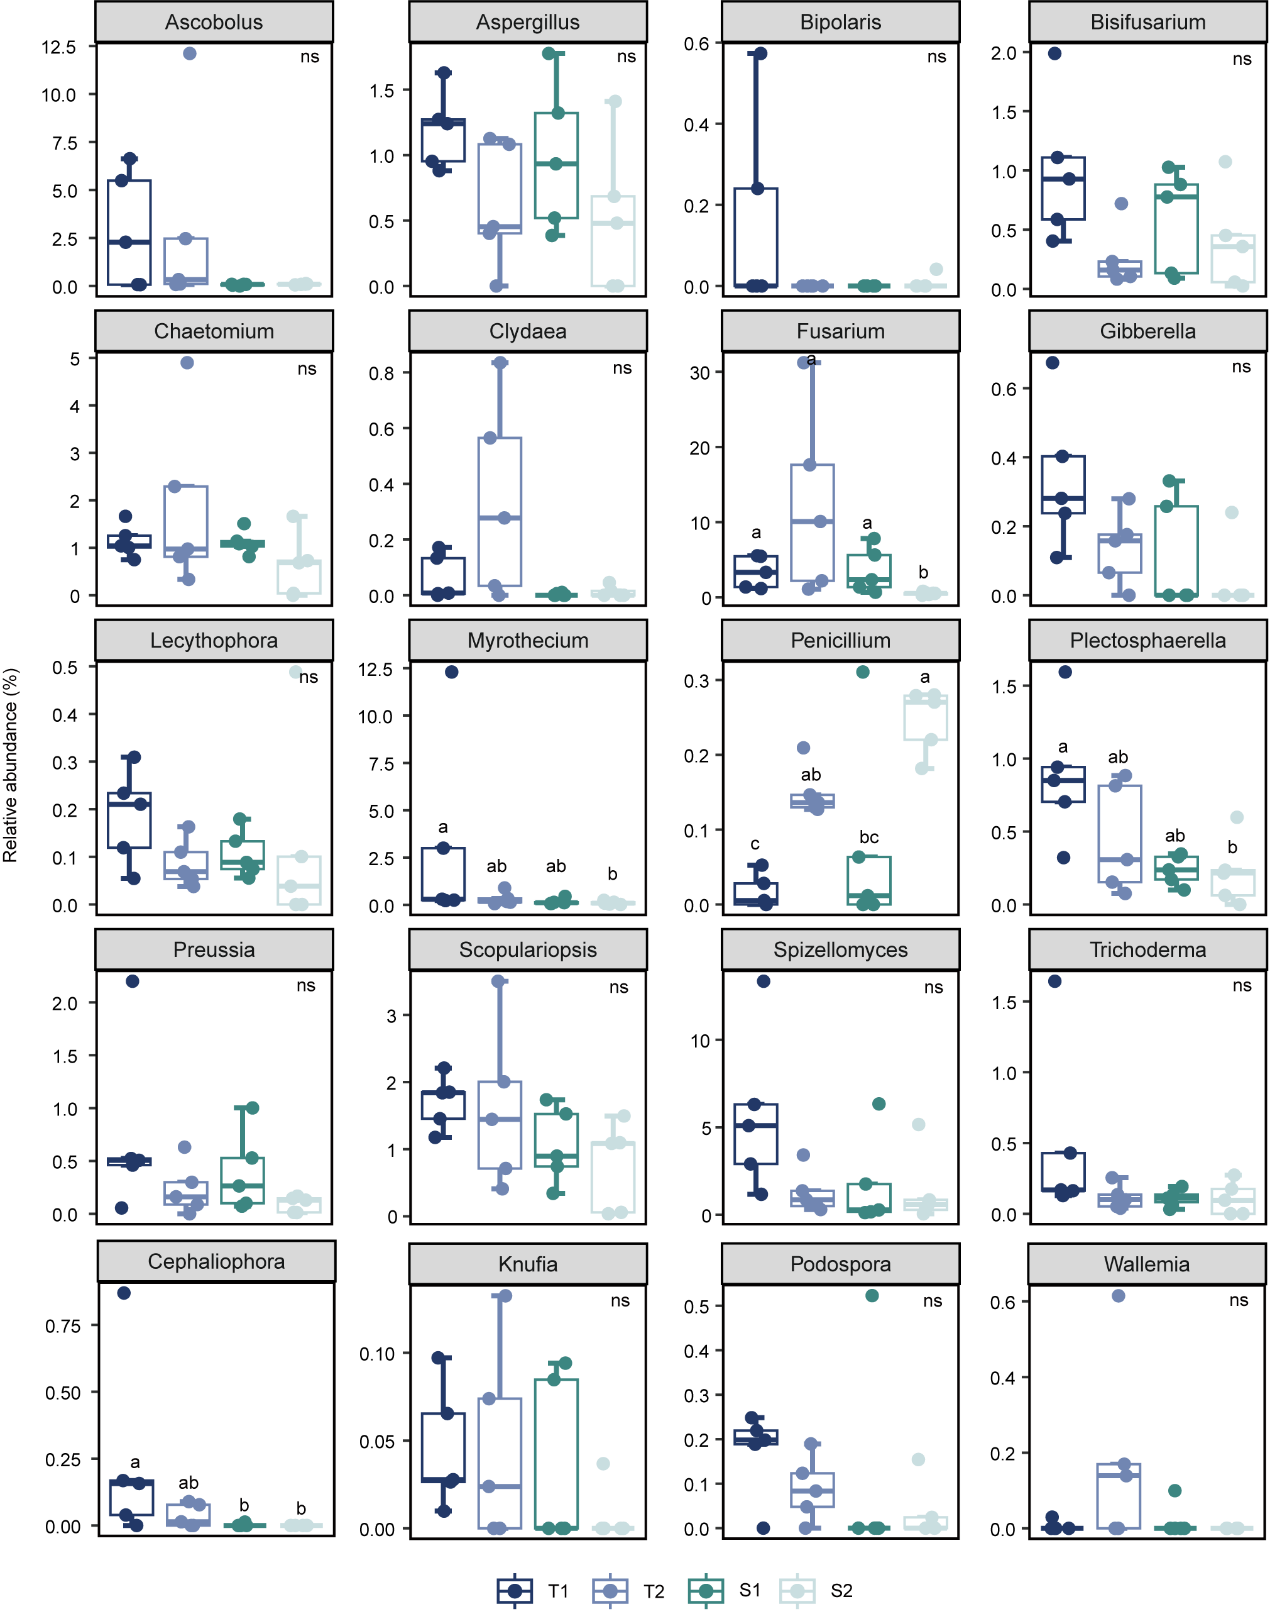


**Supplementary Fig. 5. Relative abundance of fungal genera enriched in the rhizosphere of T1, T2, S1, and S2 conditioned soils.** Boxplots indicate median, 25th (box bottom line), 75th (box top line) percentiles, and 5th (the lower whisker) and 95th (the upper whisker) percentiles (n = 5). Different letters represent the significant difference (*p* <0.05, Kruskal-Wallis sum-rank test); ns represents no significance.


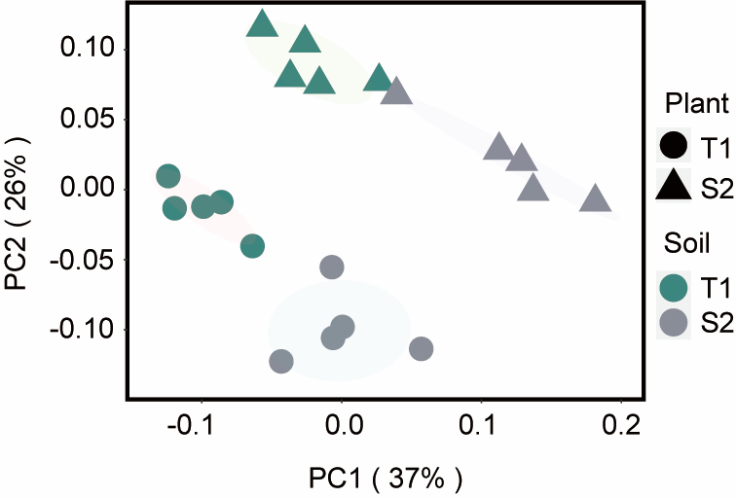


**Supplementary Fig. 6. Principal coordinates analysis (PCoA) of root gene expression.** PCoA of gene expression in T1 and S2 plants treated with T1- or S2-conditioned soils (T1T1, S2T1, T1S2, S2S2). PERMANOVA was performed with Adonis.


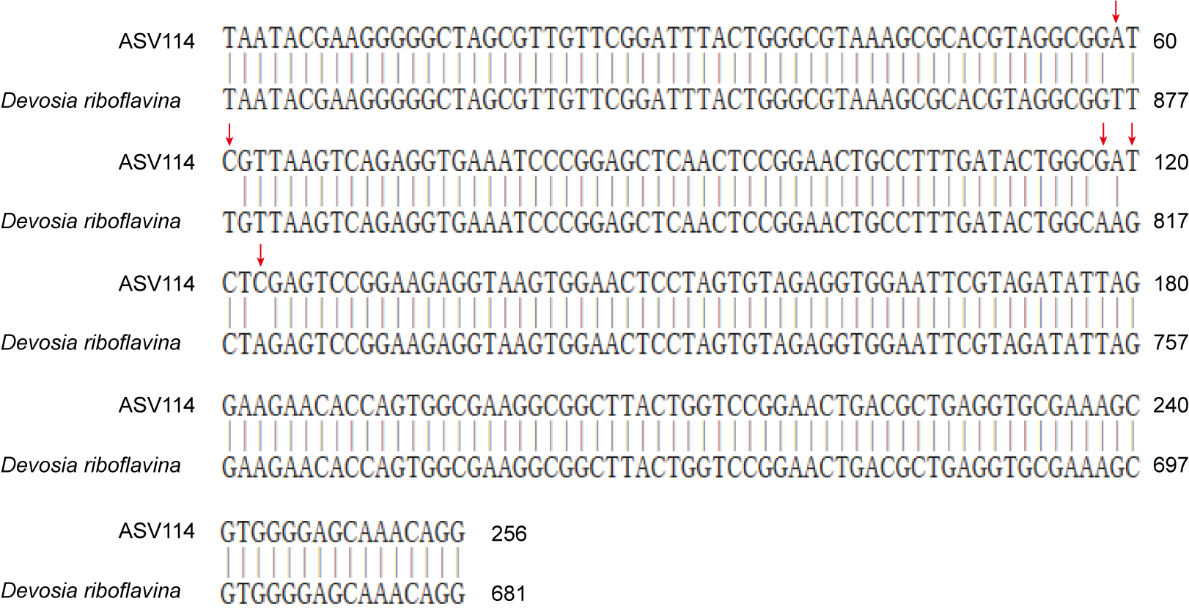


**Supplementary Fig. 7.** **16S rRNA gene sequence alignments between *Devosia riboflavina* and ASV114 (98% match).** Arrows indicate unmatched nucleotides. Source data are provided as a Source Data file.


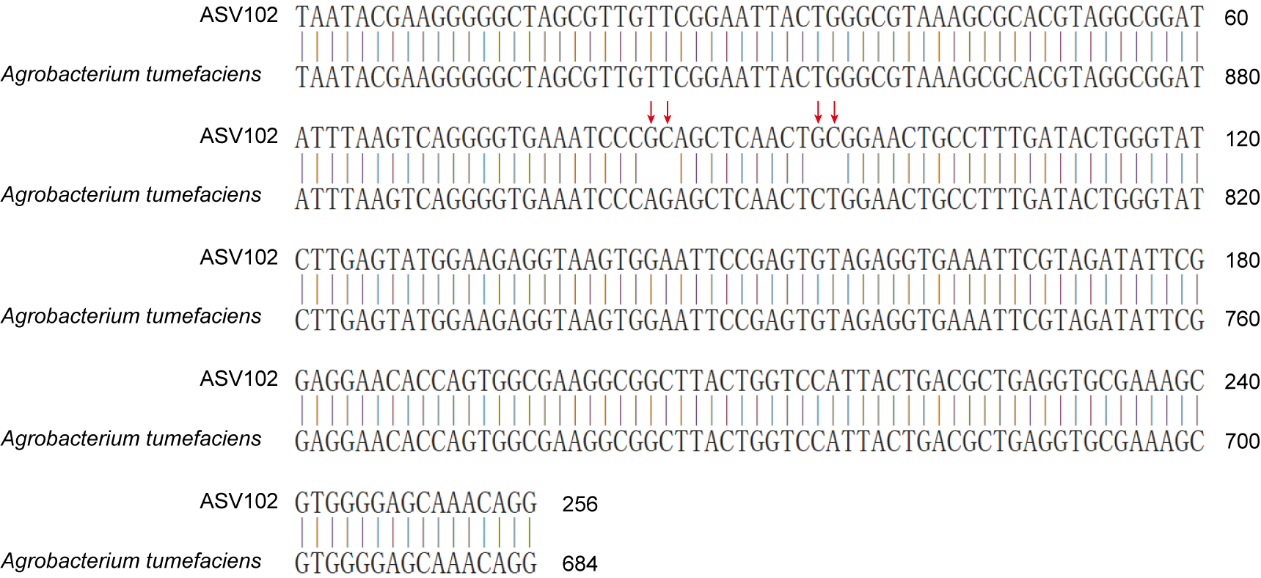


**Supplementary Fig. 8.** **16S rRNA gene sequence alignments between *Agrobacterium tumefaciens* and ASV102 (98% match).** Arrows indicate unmatched nucleotides. Source data are provided as a Source Data file.


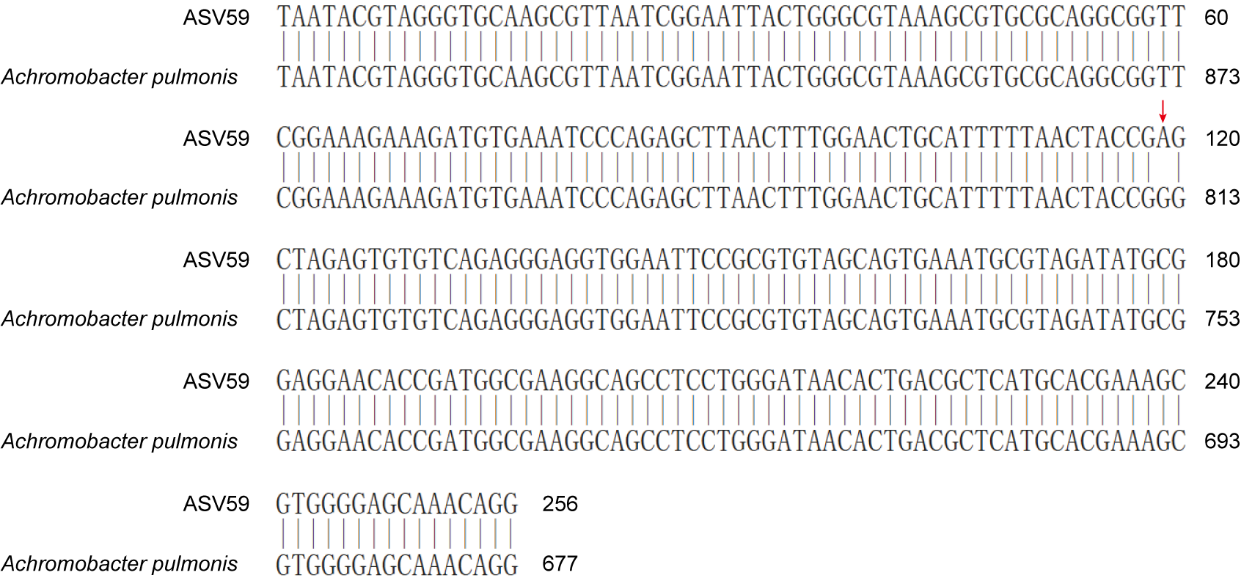


**Supplementary Fig. 9.** **16S rRNA gene sequence alignments between *Achromobacter pulmonis* and ASV59 (99% match).** Arrows indicate unmatched nucleotides. Source data are provided as a Source Data file.

**Supplementary Table 1. Primer sequences used for quantification of genes related to lignin biosynthesis.**

| Gene | Primer | Sequence 5'–3' |
| --- | --- | --- |
| GAPDH | Forward | 5'-AGGTCGGTGTGAACGGATTTG-3' |
| Reverse | 5'-GGGGTCGTTGATGGCAACA-3' |
| CYP73A | Forward | 5'-GAGATCAGATGCGCCATGGA-3' |
| Reverse | 5'-TTTGACTGGATGTCCGGGTG-3' |
| E2.3.1.133 | Forward | 5'-CGATGCACCACTCGATCGTA-3' |
| Reverse | 5'-CTGGCTTGTACTCTGGGTGG-3' |
| CYP98A | Forward | 5'-ACGATCTCCTTGAACTCGCG-3' |
| Reverse | 5'-GAGTTCCTCGCTATGGTCGG-3' |
| E2.1.1.104 | Forward | 5'-CTCGATCCTGGAGTACGTGC-3' |
| Reverse | 5'-AAGAACTGCATCTGGTCCGG-3' |
| CCR | Forward | 5'-CTCAAGTACCTGGACGGCTC-3' |
| Reverse | 5'-AGAACTTGCGGAGGATGGTG-3' |
| COMT | Forward | 5'-CTCAGGGGGTGTTCCATGTC-3' |
| Reverse | 5'-AGTGAACTCGATGGCCCATG-3' |
| F5H | Forward | 5'-CAGTGCTCATGGTCATGGGT-3' |
| Reverse | 5'-CATCGCTACTGGTCCTGTCC-3' |
| CAD | Forward | 5'-ATGGTGGTGGTGCATGAGAG-3' |
| Reverse | 5'-ACTTCATGGGGCTGTACACG-3' |
| E1.11.1.7 | Forward | 5'-GCTCAGTTCTTGTGCTGTGC-3' |
| Reverse | 5'-TGGAAATGGAGCCTGAGCAG-3' |
